# Supplementary material for: Angled-stencil lithography based metal mesh/Ti3C2Tx MXene hybrid transparent electrodes for low-power and high-performance wearable thermotherapy
Source: Royal Society of Chemistry journal article supplement (doi:10.1039/d1tc00091h), 2021-01-01
Supplement: d1tc00091h1.pdf [file d1tc00091h1.pdf]

1  
2  
3  
4  
5  
6  
7  
8  
9  
10  
11  
12  
13  
14  
15  
16  
17  
18  
19  
20  
21  
22

## Electronic Supplementary Information (ESI)

### **Angled-Stencil Lithography based Metal mesh/Ti<sub>3</sub>C<sub>2</sub>T<sub>x</sub> MXene Hybrid transparent electrodes for Low-power and High-performance Wearable Thermotherapy**

Mozakkar Hossain,<sup>a,b</sup> Sibin Kunhi Purayil,<sup>a</sup> K. D. M Rao,<sup>\*a,b</sup>

<sup>a</sup>*School of Applied & Interdisciplinary Sciences, Indian Association for the Cultivation of Science, Jadavpur, Kolkata 700032, India. E-mail: mallik2arjun@gmail.com (K. D. M. R.).*

<sup>b</sup>*Technical Research Centre, Indian Association for the Cultivation of Science, Jadavpur, Kolkata 700032, India. E-mail: trckdmr@iacs.res.in (K. D. M. R.).*

## Table of content

|    |                                                                                       |           |
|----|---------------------------------------------------------------------------------------|-----------|
| 24 | 1. Schematic illustration and optical microscope images of metal stencil.....         | Figure S1 |
| 25 | 2. Large area optical microscope image of Ag micro-mesh.....                          | Figure S2 |
| 26 | 3. Atomic force microscopy analysis of Ag micro-mesh.....                             | Figure S3 |
| 27 | 4. Characterization of Ag and Cu micro-mesh TCEs.....                                 | Figure S4 |
| 28 | 5. Transmission <i>vs</i> wavelength of Ag micro-meshes for different thicknesses...  | Figure S5 |
| 29 | 6. Transmission <i>vs</i> wavelength of Ag meshes at different deposition angles..... | Figure S6 |
| 30 | 7. Characterization of $Ti_3C_2T_x$ MXene solution.....                               | Figure S7 |
| 31 | 8. Details of hybrid Ag micro-mesh/ $Ti_3C_2T_x$ MXene TCE.....                       | Figure S8 |
| 32 | 9. Temperature stability profile with respect to time of hybrid TCE.....              | Figure S9 |
| 33 | 10. Details of thickness-dependent angled-stencil lithography.....                    | Table T1  |
| 34 | 11. Details of angle-dependent angled-stencil lithography.....                        | Table T2  |
| 35 | 12. Details of Raman vibrational modes of $Ti_3C_2T_x$ MXene thin-film.....           | Table T3  |
| 36 | 13. Details of Thickness dependent sheet resistance and transmittance of MXene..      | Table T4  |
| 37 | 14. Details of literature comparison among transparent heaters.....                   | Table T5  |
| 38 | 15. Details of literature comparison among wearable heaters.....                      | Table T6  |
| 39 | 16. Details of geometrical fill factor calculation of Ag micro-mesh.....              | Section 1 |
| 40 | 17. Details of the figure of merit calculation of TCEs.....                           | Section 2 |
| 41 | 18. Experimental section.....                                                         | Section 3 |
| 42 |                                                                                       |           |

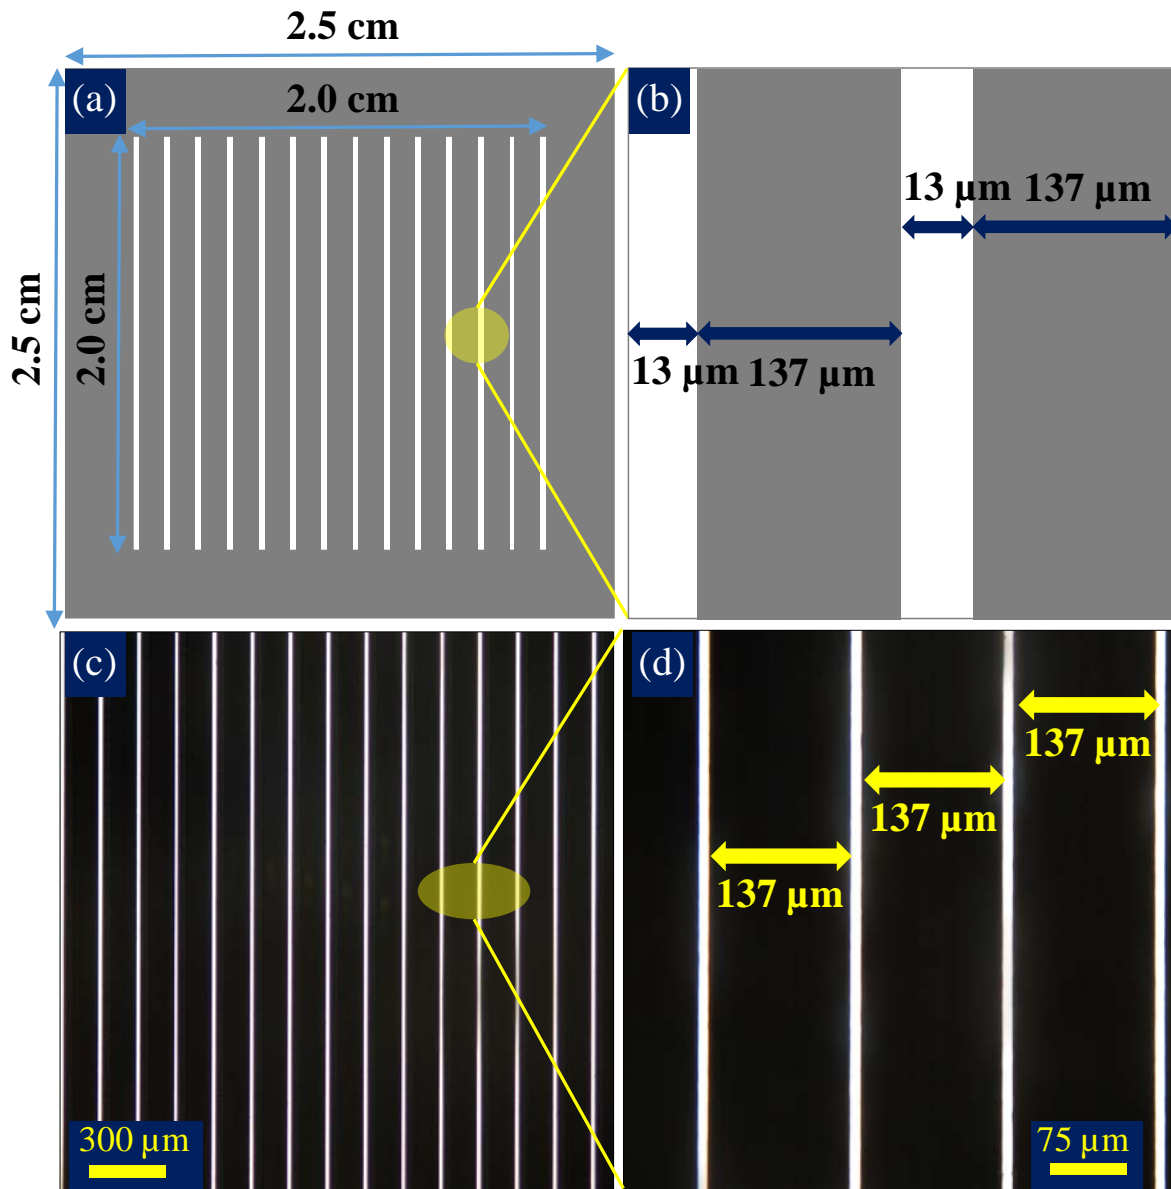

43  
 44 **Figure S1.** Schematic illustration of the metal stencil, (a) front view, (b) magnified view of  
 45 two-unit cells. Optical microscope images of metal stencil (c) front view at 5x optical zoom,  
 46 (d) magnified view.

47 The metal stencils are essential for angled-stencil lithography to fabricate metal micro-mesh  
 48 structures. Here, custom-designed metal stencils are adopted as a template. The metal stencil  
 49 is square with of 2.5 x 2.5 cm<sup>2</sup> area with a thickness of 50 μm where 0.5 cm metal borders are  
 50 constructed for the stability of the mask (see Figure S1a). The unit cell of the metal stencil  
 51 consists of a rectangular aperture with 13 μm width, 2 cm length, and a pitch of 137 μm, which  
 52 are repeated throughout the 2 x 2 cm<sup>2</sup> area. The enlarged schematic in Figure S1b displays two-  
 53 unit cells of the metal stencil. The large area optical microscope image shown in Figure S1c

54 reveals the repetition of aperture and pitch of the metal stencil. For more clarity, a magnified  
55 optical microscopy image is presented in Figure S1d.

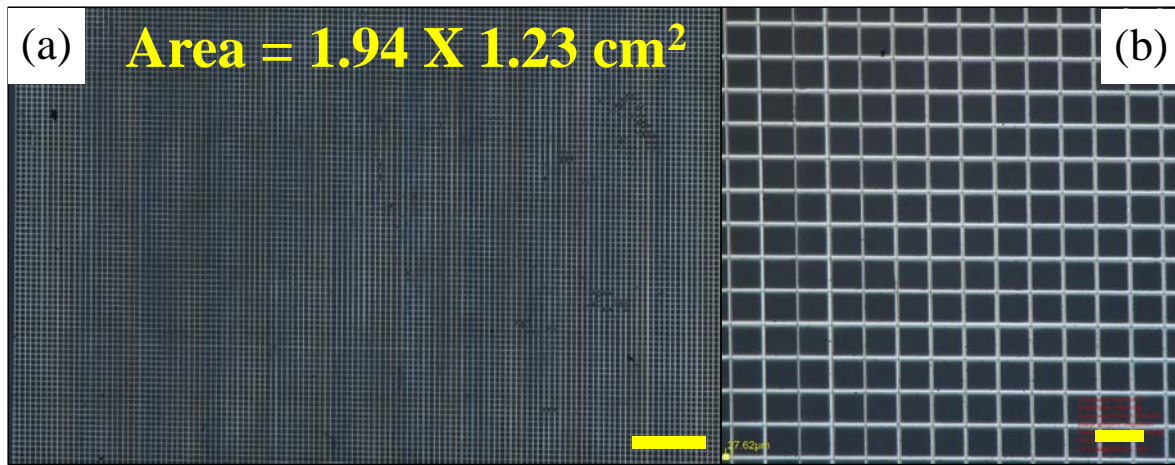

56  
57 **Figure S2.** Optical microscope images of Ag micro-mesh, (a) over a large area of 1.94 x 1.23  
58 cm<sup>2</sup>, (scale bar 0.2 cm), (b) corresponding magnified image, (scale bar 250 µm).

59 Optical microscope images of Ag micro-mesh are captured and shown in Figure S2.  
60 Figure S2a demonstrates the Ag micro-mesh over a large area of 1.94 x 1.23 cm<sup>2</sup>, which  
61 confirms the scalability of angled-stencil lithography. The corresponding magnified Optical  
62 microscope image is shown in Figure S2b, where the horizontal and vertical microstructures  
63 of Ag micro-mesh are highly aligned, resulting in a constant fill factor throughout the mesh  
64 structure.

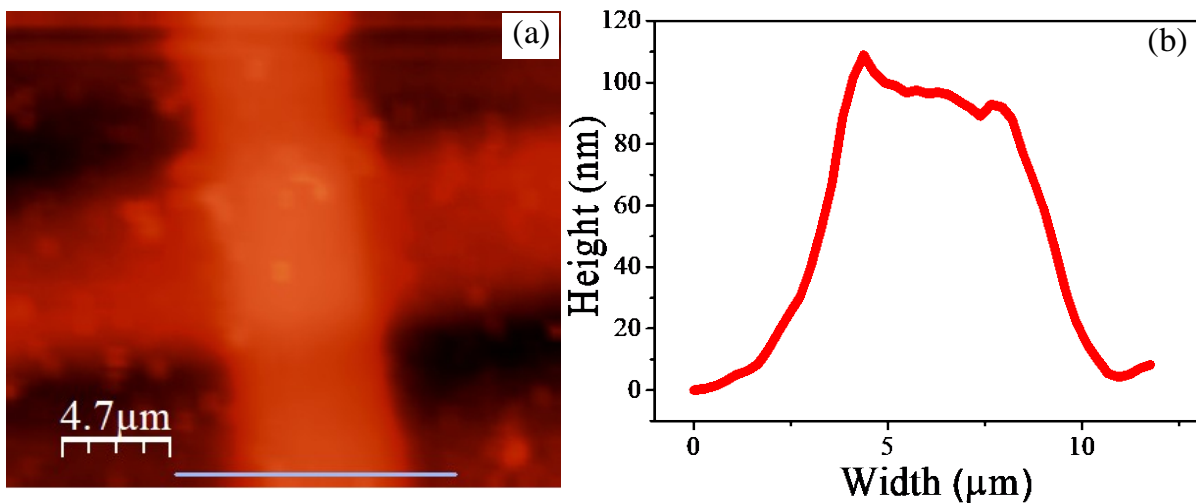

65  
66 **Figure S3.** Atomic force microscopy image of (a) a junction in Ag micro-mesh structures, (b)  
67 and corresponding height profile.

68 To evaluate the height of individual microstructures of Ag micro-mesh atomic force  
69 microscopy is performed, and corresponding results are presented in Figure S3. AFM image in  
70 Figure S3a illustrates a junction of Ag micro-mesh structures consisting of horizontal and  
71 vertical microstructures. The height profile extracted from the AFM image is shown in Figure  
72 S3b. The individual microstructure thickness is 110 nm.

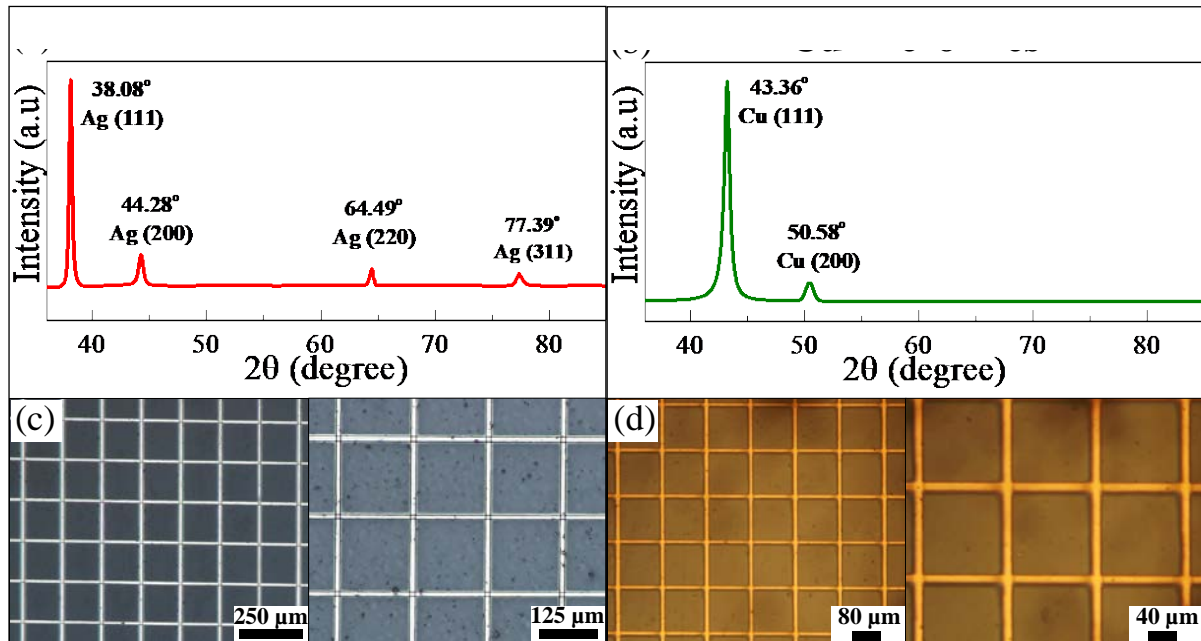

73  
74 **Figure S4.** Characterization of metal micro-mesh TCEs (a, b) X-ray diffraction pattern of Ag  
75 and Cu micro-mesh based TCEs, respectively, (c, d) corresponding optical microscope images  
76 of Ag and Cu micro-mesh TCEs, respectively.

77 Angled-stencil lithography is a viable solution for fabricating metal micro-mesh TCEs  
78 using any refractory metals. As an example, Ag and Cu micro-mesh TCEs are fabricated using  
79 angled-stencil lithography (see Figure S4). X-ray diffraction patterns of both the metal micro-  
80 meshes are recorded and depicted in Figure S4a and S4b. The diffraction peaks confirm the  
81 existence of Ag<sup>1</sup> and Cu<sup>2</sup> metals in the respective micro-meshes. Optical microscope images  
82 of Ag and Cu micro-mesh TCEs are captured and shown in Figure S4c and S4d, respectively.  
83 It is evident from the images that both the micro-mesh TCEs resemble identical

84 microstructures. Thus, angled-stencil lithography is a universal technique to fabricate metal  
85 micro-mesh TCEs without any constraint on source metal.

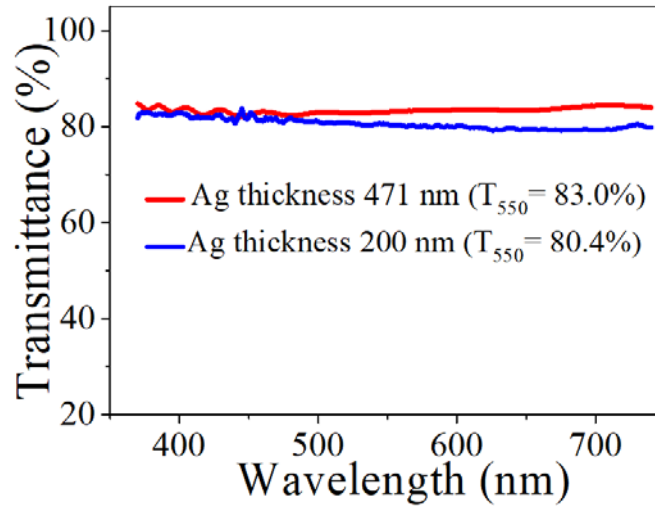

86

87 **Figure S5.** Transmittance as a function of the wavelength of Ag micro-meshes for different  
88 thicknesses.

89 Angled-stencil lithography facilitates the fabrication of the vertical structured metal  
90 micro-meshes without any limitation over thickness. Ag micro-mesh of different thicknesses  
91 are fabricated, and corresponding transmittance spectra are represented in Figure S5. Despite  
92 increasing thickness from 200 to 471 nm, the transmittance of Ag micro-meshes is 80.4 % and  
93 83 % at 550 nm, respectively, which is almost constant. The overall transmittance throughout  
94 the visible region also remains constant for both the micro-meshes, respectively. The constant  
95 transmittance is attributed to the constant fill factor as a result of angled-stencil lithography.

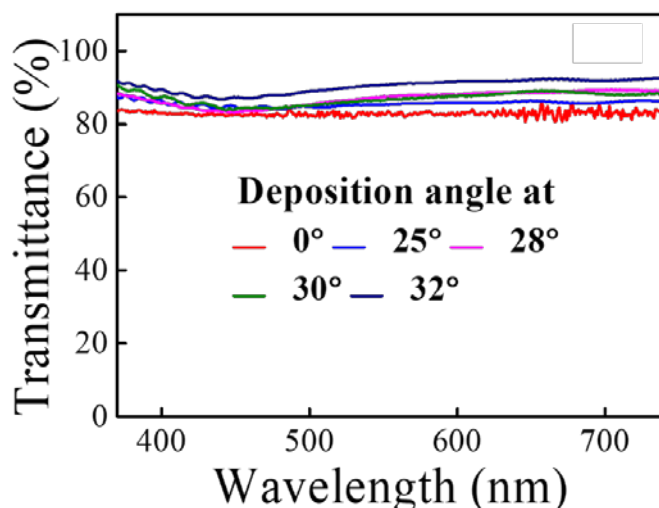

**Figure S6.** Transmittance as a function of the wavelength of Ag micro-mesh for different deposition angles.

Ag micro-meshes are fabricated at  $0^\circ$ ,  $25^\circ$ ,  $28^\circ$ ,  $30^\circ$ , and  $32^\circ$  deposition angles employing angled-stencil lithography. The transmittance of as-fabricated Ag micro-meshes with different deposition angles are measured in the visible range and presented in Figure S6. The transmittance increases from 83 % to 90 % upon increasing the deposition angle from  $0^\circ$  to  $32^\circ$ , analogous to the decreased fill factor.

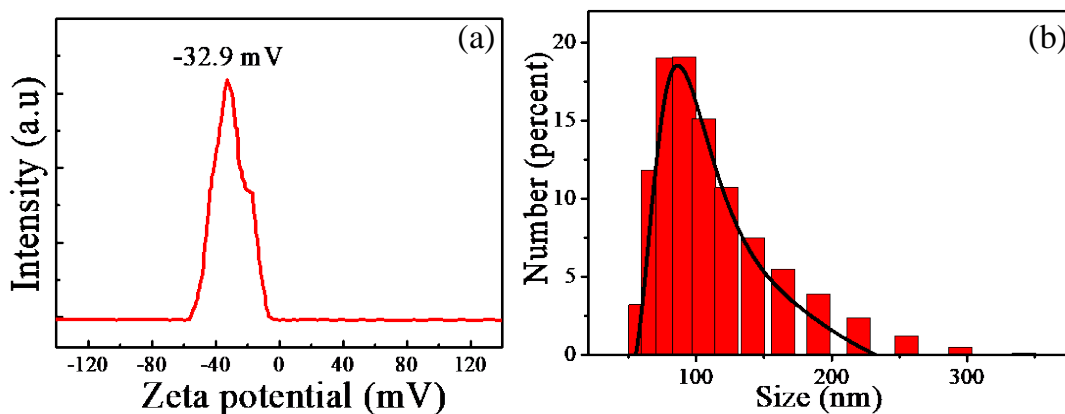

**Figure S7.** Characterization of  $Ti_3C_2T_x$  MXene colloidal solution, (a) zeta potential, (b) particle size distribution.

To characterize the  $Ti_3C_2T_x$  MXene colloidal solution, Zeta potential analysis is measured and shown in Figure S7. The zeta potential is found to be  $-32.9$  mV (see Figure S7a), which is close to previously reported zeta potentials of pure  $Ti_3C_2T_x$  MXenes.<sup>3</sup> The particle

117 sizes of the  $Ti_3C_2T_x$  MXene colloidal solution is analyzed using the dynamic light scattering  
 118 method and depicted in Figure S7b. The average particle size of the precursor solution is 100  
 119 nm, which is suitable for the fabrication of spray-coated  $Ti_3C_2T_x$  MXene thin films.

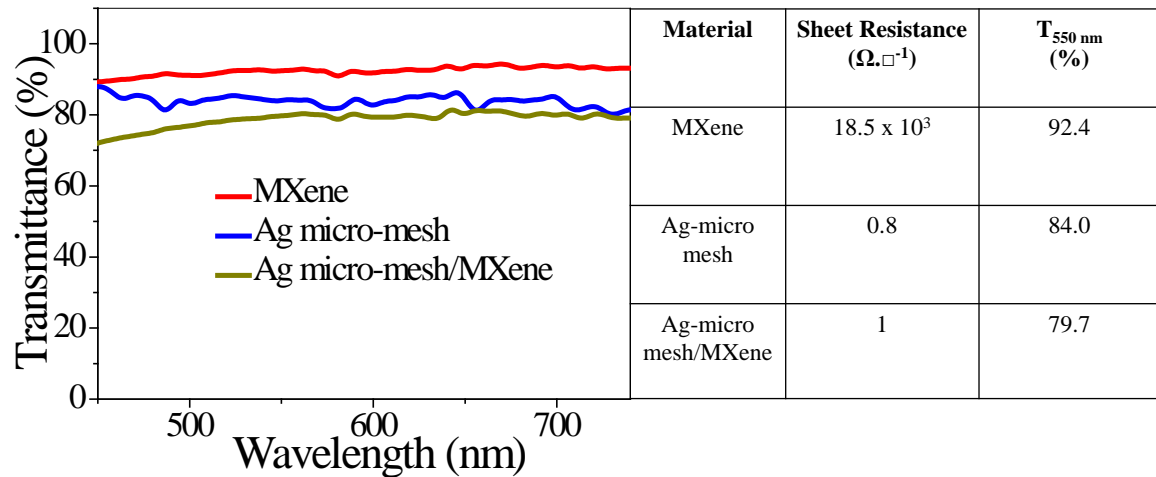

120

121 **Figure S8.** Transmission as a function of wavelength for hybrid Ag micro-mesh/ $Ti_3C_2T_x$   
 122 MXene TCE and  $Ti_3C_2T_x$  MXene, Ag micro-mesh. Corresponding sheet resistances are  
 123 tabulated.

124 Hybrid Ag micro-mesh/  $Ti_3C_2T_x$  MXene TCEs are fabricated using angled-stencil  
 125 lithography followed by spray coating of  $Ti_3C_2T_x$  MXene. The transmittance and sheet  
 126 resistance of pristine Ag micro-mesh TCE and hybrid TCE are measured, as shown in Figure  
 127 S8. Spray coated pristine  $Ti_3C_2T_x$  MXene thin films exhibit a transmission of 92.7 % at 550  
 128 nm with a sheet resistance of  $18.3 \times 10^3 \Omega \cdot \square^{-1}$ . The transmittance and sheet resistance of hybrid  
 129 TCE is 79.7 % and  $1 \Omega \cdot \square^{-1}$ , respectively. The reduction in transmittance is attributed to the  
 130 absorption of the  $Ti_3C_2T_x$  MXene thin film layer.



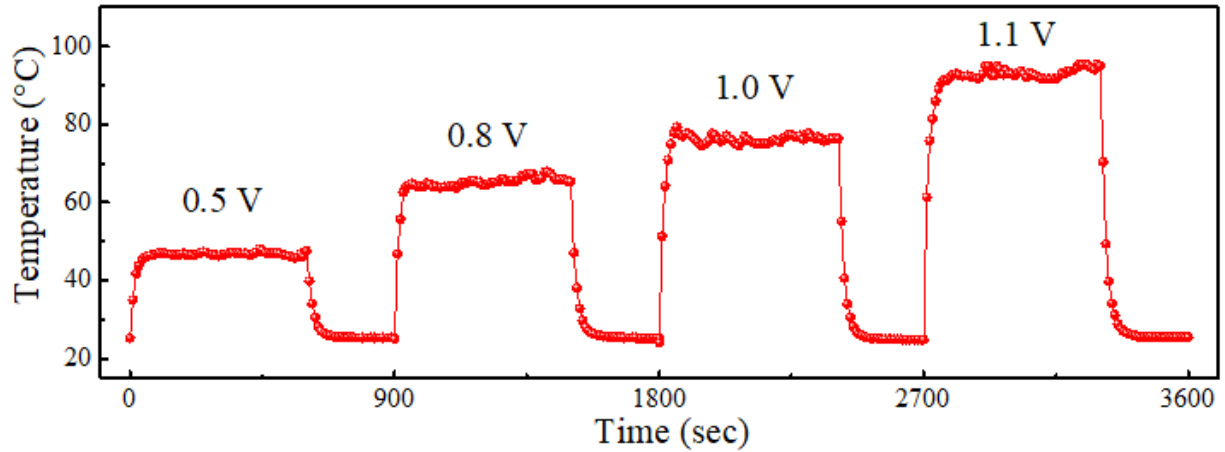

131

132 **Figure S9.** Temperature stability profile with respect to time at different applied biases 0.5,  
 133 0.8, 1.0, and 1.1 V of the hybrid Ag micro-mesh/Ti<sub>3</sub>C<sub>2</sub>T<sub>x</sub> MXene transparent heaters.

134 The hybrid heaters are applied with modulated bias from 0.5 V to 1.1 V and examined  
 135 the temperature stability with respect to time as depicted in Figure S9. The hybrid transparent  
 136 heater reached steady state temperature of 46.4, 66.1, 75.3 to 94.9 °C with the applied bias of  
 137 0.5, 0.8, 1.0 to 1.1 V, respectively. In each cycle, the acquired temperatures are steady  
 138 throughout 600 s until the bias is turned off. The temperature profile of hybrid heater is  
 139 examined for prolong duration of  $3.6 \times 10^3$  s. Thus, the hybrid Ag micro-mesh/Ti<sub>3</sub>C<sub>2</sub>T<sub>x</sub> MXene  
 140 based transparent heaters demonstrated remarkable heating stability.

141 **Table T1:** Details Ag micro-mesh TCEs with different thicknesses.

| SL No | Material | Deposition Angle (°) | Thickness (nm) | T <sub>550nm</sub> (%) | Sheet -resistance (Ω/□) | FOM               |
|-------|----------|----------------------|----------------|------------------------|-------------------------|-------------------|
| 1     | Ag       | 0                    | 110            | 82.9                   | 2.3                     | 785               |
| 2     | Ag       | 0                    | 200            | 80.4                   | 2                       | 798               |
| 3     | Ag       | 0                    | 471            | 83                     | 0.8                     | $2.4 \times 10^3$ |

142

143

144

145

146

147 **Table T2.** Variation of wire width and geometrical fill factor of Ag micro-mesh as a function  
 148 of deposition angle.

| Deposition Angle (°) | Wire Width (μm) | Geometrical Fill Factor (%) |
|----------------------|-----------------|-----------------------------|
| 0                    | 13              | 16.5                        |
| 25                   | 8.91            | 11.52                       |
| 28                   | 7.6             | 9.87                        |
| 30                   | 6.1             | 7.96                        |
| 32                   | 4.4             | 5.78                        |

149

150 **Table T3.** Details of Raman vibrational modes of  $Ti_3C_2T_x$  MXene thin-film.

| Raman shift (cm <sup>-1</sup> ) | $Ti_3C_2T_x$ MXene | Vibration mode          |
|---------------------------------|--------------------|-------------------------|
| 201                             | $Ti_3C_2O_2$       | $\omega_1$ ( $A_{1g}$ ) |
| 375                             | $Ti_3C_2O_2$       | $\omega_4$ ( $E_g$ )    |
| 514                             | $Ti_3C_2(OH)_2$    | $\omega_6$ ( $A_{1g}$ ) |
| 592                             | $Ti_3C_2O_2$       | $\omega_5$ ( $A_{1g}$ ) |
| 627                             | $Ti_3C_2(OH)_2$    | $\omega_4$ ( $E_g$ )    |
| 693                             | $Ti_3C_2F_2$       | $\omega_3$ ( $A_{1g}$ ) |

151 The functional groups in  $Ti_3C_2T_x$  MXene are one of the fundamental elements to enrich the  
 152 performance of  $Ti_3C_2T_x$  MXene. The formation of pure  $Ti_3C_2T_x$  MXene in the phase is  
 153 confirmed by XRD analysis. in the thin film, Raman spectra of  $Ti_3C_2T_x$  MXene thin film is  
 154 captured to examine surface functional groups (see Table T1).<sup>4-5</sup>

155

156

157

158

159

160 **Table T4:** Comparison of thickness dependent sheet resistance and transmittance for the  
161 pristine  $Ti_3C_2T_x$  MXene and hydride TCE.

| S.No. | Material and thickness                      | Transmittance at 550 nm | Sheet resistance ( $k\Omega/\square$ ) |
|-------|---------------------------------------------|-------------------------|----------------------------------------|
| 1.    | $Ti_3C_2T_x$ MXene with 15 nm               | 95%                     | 100                                    |
| 2.    | $Ti_3C_2T_x$ MXene with 25 nm               | 92%                     | 18                                     |
| 3.    | $Ti_3C_2T_x$ MXene with 60 nm               | 53%                     | 0.5                                    |
| 4.    | Ag micro-mesh                               | 83%                     | 0.8                                    |
| 5.    | Ag micro-mesh with 25 nm $Ti_3C_2T_x$ MXene | 79.8%                   | 1                                      |

162

163

164

165

166

167

168

169

170

171

172

173

174

175

**Table T5.** Literature comparison of transparent heaters and their performance.

| SL No | Active Material                                                   | Process                              | *T <sub>550nm</sub> (%) | Voltage (V) | Power (W/cm <sup>2</sup> ) | Peak Temp (°C) | SR (Ω/□) | FOM   | Thermal resistance (°C cm <sup>2</sup> .W <sup>-1</sup> ) | Ref No    |
|-------|-------------------------------------------------------------------|--------------------------------------|-------------------------|-------------|----------------------------|----------------|----------|-------|-----------------------------------------------------------|-----------|
| 1     | AgNW-PEDOT:PSS/ITO                                                | Slot-die-coated                      | 95                      | 11          | 0.4                        | 115            | 41       | 176   | 210                                                       | 6         |
| 2     | Au mesh                                                           | Photo-Lithography                    | 80                      | > 5.5       | 0.5                        | 150            | 5        | 336   | 249                                                       | 7         |
| 3     | Ag mesh                                                           | Crackle Lithography                  | 77                      | 8.5         | 0.57                       | 170            | 1        | 1350  | 255                                                       | 8         |
| 4     | Pt mesh                                                           | Photo-lithography Lift-off           | 89                      | 5           | 0.18                       | 69             | 94       | 33.4  | 258                                                       | 9         |
| 5     | Ag mesh                                                           | Crackle Network                      | 86                      | <5          | 0.13                       | 100            | 6        | 401   | 515                                                       | 10        |
| 6     | Ag CP                                                             | Crackle Network                      | 86                      | ---         | 0.20                       | 110            | 7        | 343   | 420                                                       | 11        |
| 7     | AgNW PEDOT:PSS                                                    | Solution Process                     | 70                      | 6           | 0.25                       | 110            | 4        | 241   | 179                                                       | 12        |
| 8     | AgNW/PU                                                           | Spin/Spray Coating                   | 77                      | 6           | 0.75                       | 102            | 13       | 103   | 100                                                       | 13        |
| 9     | PEDOT:Sulf                                                        | Spin Coating                         | 87.8                    | 12          | 0.24                       | 138            | 57       | 50    | 384                                                       | 14        |
| 10    | Ag Nano Fibers                                                    | Electrospinning                      | 83                      | 4.5         | 0.65                       | 250            | 0.5      | 3861  | 346                                                       | 15        |
| 11    | Au Mesh                                                           | Crackle-template                     | 87                      | 15          | 2.8                        | 600            | 5.4      | 472   | 189                                                       | 16        |
| 12    | Ag Nanotrough                                                     | Thermal evaporation/ Electrospinning | 87                      | 7           | 0.30                       | 100            | 23       | 114   | 276                                                       | 17        |
| 13    | Pd Network                                                        | Crackle lithography                  | 80                      | 9           | 0.85                       | 75             | 200      | 7.98  | 100                                                       | 18        |
| 14    | SWNTs                                                             | Solution Process                     | 90                      | 7           | 0.26                       | 100            | 93       | 37.4  | 187                                                       | 19        |
| 15    | Polymer mesh                                                      | Photopatterning                      | 85                      | 3           | 0.18                       | 69             | 10       | 220   | 255.9                                                     | 20        |
| 16    | Ag micro-mesh                                                     | Angled-Stencil Lithography           | 82                      | 2.3         | 0.12                       | 99             | 5.38     | 335.8 | 506.6                                                     | This Work |
| 17    | Ag micro-mesh/Ti <sub>3</sub> C <sub>2</sub> T <sub>x</sub> MXene | Angled-Stencil Lithography           | 80                      | 1.2         | 0.10                       | 99             | 1.6      | 998   | 675                                                       | This Work |

177 \*T<sub>550nm</sub> = transmittance at 550 nm

178 The Ag micro-mesh/Ti<sub>3</sub>C<sub>2</sub>T<sub>x</sub> MXene transparent heater fabricated through angled-  
 179 stencil lithography demonstrated low power consumption of 0.10 W/cm<sup>2</sup> resulting in record-  
 180 high thermal resistance of 675 °C cm<sup>2</sup>.W<sup>-1</sup>, low actuation voltage of 1.2 V, and ultra-low power  
 181 consumption among transparent heaters fabricated in literature including Ag NW-  
 182 PEDOT:PSS<sup>6,12</sup>, Metal meshes<sup>7-11,16,18</sup>, Ag NW/PU<sup>13</sup>, PEDOT:Sulf<sup>14</sup>, AgNano Fibers<sup>15</sup>, Ag  
 183 Nanotrough<sup>17</sup>, SWNTs<sup>19</sup>, Polymer mesh<sup>20</sup>.

184

185 **Table T6.** Literature comparison of Wearable heaters performance.

186

| SL No | Active Material                                                   | Process                                  | Transparent/Opaque | *T <sub>550nm</sub> (%) | Voltage (V) | Power (W/cm <sup>2</sup> ) | Peak Temp (°C) | SR (Ω/□) | Ref No    |
|-------|-------------------------------------------------------------------|------------------------------------------|--------------------|-------------------------|-------------|----------------------------|----------------|----------|-----------|
| 1     | ANF/Ag NW nanocomposite                                           | vacuum assisted filtration/ hot-pressing | Transparent        | 40                      | 1.5         | 0.41                       | 200            | 0.40     | 1         |
| 2     | Ag Nano Fibers                                                    | Electrospinning                          | Transparent        | 83                      | 4.5         | 0.65                       | 250            | 0.5      | 15        |
| 3     | CuZr MG Nano trough                                               | Electrospinning/ Co-sputtering           | Transparent        | 90                      | 7           | 3.2                        | 180            | 3.8      | 21        |
| 4     | Ag NW Film                                                        | Supersonic cold spraying                 | Transparent        | 95                      | 6           | 0.27                       | 180            | 15       | 22        |
| 5     | Al Paper                                                          | Spin coating                             | Opaque             | ---                     | 1.5         | 5.95                       | 50             | 0.075    | 23        |
| 6     | Weft-knitted carbon fabric                                        | Heat Treatment process                   | Opaque             | ----                    | 3           | 0.30                       | 150            | 1.89     | 24        |
| 7     | LM@PDMS                                                           | direct ink writing                       | Opaque             | ---                     | 3.5         | 0.15                       | 100            | 8.88     | 25        |
| 8     | MXene-decorated polymeric textile                                 | Dip Coating                              | Opaque             | ---                     | 2.5         | 0.31                       | 200            | 5        | 26        |
| 9     | Ag micro-mesh/Ti <sub>3</sub> C <sub>2</sub> T <sub>x</sub> MXene | Angled-Stencil Lithography               | Transparent        | 80                      | 1.3         | 0.12                       | 99             | 1.7      | This Work |

187 \*T<sub>550nm</sub> = transmittance at 550 nm

## Section 1. Geometrical Fill factor calculation of Ag micro-mesh.

The fill factor of Ag micro-meshes is estimated using the following equation.<sup>27</sup>

$$FF = \frac{(p \times w) + [(p-w) \times w]}{p^2} \text{-----(1)}$$

Where FF = geometrical fill factor (percentage of material present in the micro-mesh),

w = line width of the individual microstructure of Ag micro-mesh,

p (pitch size) = distance between two consecutive microstructures,

The geometrical fill factor is a mathematical calculation to predict the percentage of material. Here, the percentage of metallic conduits present in Ag micro-mesh TCEs are estimated using FF.

## Section 2. Figure of merit calculation of TCEs.

The figure of merit of a transparent conducting electrode can be evaluated from the following equation.<sup>28</sup>

$$FOM = \frac{188.5}{R_s * (\frac{1}{\sqrt{T}} - 1)} \text{----- (2)}$$

Where, FOM (Figure of Merit) =  $\frac{\sigma_{dc}}{\sigma_{opt}}$  = ratio of electrical conductance to optical conductance,

$R_s$  = sheet resistance of the TCE,

T = transmittance of the TCE at 550 nm.

The figure of merit (FOM) is a tool to evaluate the performance of TCEs. It is defined as the ratio of electrical conductance to optical conductance. To meet the requirement of TCEs, the minimum value of FOM is 35, and the average TCE FOM values are around 350.

## Section 3. Experimental Section.

### 3.1. Materials:

Ti<sub>3</sub>AlC<sub>2</sub> is purchased from Y-carbon. Ag, Cu, LiF, and HCl were purchased from Sigma-Aldrich. Silicone oil is purchased from Loba chemicals. The metal stencils are designed as mentioned earlier, and purchased from Harshini Industries from Bangalore. All the chemicals were used without further purification.

### 213 **3.2. Fabrication of metal-micro mesh TCEs:**

214 The Glass/PET substrates are cleaned in soap water and ultrasonicated in Milli-Q water,  
215 acetone, and isopropanol for 10 minutes each, respectively. The Glass/PET substrates of 2.5 x  
216 2.5 cm<sup>2</sup> were conformally attached with metal stencils and placed inside the physical vapor  
217 deposition system (Hind High Vacuum Company Private Limited: model:12A4D). The metals  
218 are placed in a molybdenum boat inside a vacuum chamber, which is maintained at ~ (1-3)  
219 ×10<sup>-6</sup> m. bar pressure. The Ag and Cu metals were evaporated, respectively, by maintaining  
220 the deposition rate between 5-10 Å/s. After performing the first metal deposition, the stencil is  
221 rotated 90° and reattached with the substrate and reinsertion in the vacuum chamber to execute  
222 the 2<sup>nd</sup> metal deposition. To decrease the width of microstructures during the angled-stencil  
223 lithography, the deposition angle between sublimated metal flux and metal stencil containing  
224 substrate is varied from 0° to 32° using a custom-designed substrate holder.

### 225 **3.3 Synthesis of Ti<sub>3</sub>C<sub>2</sub>T<sub>x</sub> MXene nanosheets:**

226 9M 10 ml HCL solution is kept in the silicone bath to acquire 35°C using a hotplate  
227 (Tarsons). 0.8 g LiF powder is mixed in HCl solution using a magnetic stirrer at 600 RPM for  
228 10 minutes. Then 0.5 g Ti<sub>3</sub>AlC<sub>2</sub> powder is slowly added to the mixture, which is maintained at  
229 35°C and 600 RPM for 24 hours. The acidic suspension is diluted with Milli-Q water to make  
230 a total 40 ml solution. The diluted acidic suspension is centrifuged multiple times at 3500 RPM  
231 for 5 minutes until pH ~ 6 is achieved. After each centrifugation cycle, the supernatant solution  
232 is replaced with fresh Milli-Q water. After reaching pH = 6, the dark green Ti<sub>3</sub>C<sub>2</sub>T<sub>x</sub> MXene  
233 nanosheet suspension is collected for spray coating. The Ti<sub>3</sub>C<sub>2</sub>T<sub>x</sub> MXene colloidal dispersion  
234 is prepared by mixing (50-70 μl) Ti<sub>3</sub>C<sub>2</sub>T<sub>x</sub> MXene supernatant (930-950 μl) in Milli-Q water.

### 235 **3.4 Fabrication of hybrid Ag-micro mesh/ Ti<sub>3</sub>C<sub>2</sub>T<sub>x</sub> MXene TCEs:**

236 Hybrid Ag-micro mesh/Ti<sub>3</sub>C<sub>2</sub>T<sub>x</sub> MXene TCEs are fabricated using angled-stencil  
237 lithography followed by spray coating of Ti<sub>3</sub>C<sub>2</sub>T<sub>x</sub> MXene dispersion. During spray coating, 20

238 psi N<sub>2</sub> pressure is maintained, and the Ag micro-mesh substrate is kept at an elevated  
239 temperature of 50 °C. The Ti<sub>3</sub>C<sub>2</sub>T<sub>x</sub> MXene dispersion is spray-coated for 0.5 s and dried for 3-  
240 4 s using a hot air gun. The same processor is repeated until the Ti<sub>3</sub>C<sub>2</sub>T<sub>x</sub> MXene thin film is  
241 formed.

### 242 **3.5 Fabrication of transparent heater and portable thermotherapy device:**

243 Transparent heaters and thermotherapy devices are prepared with hybrid Ag-micro  
244 mesh/ Ti<sub>3</sub>C<sub>2</sub>T<sub>x</sub> MXene TCEs. The total area of the devices is 2.5 x 2.5 cm<sup>2</sup>. Two copper wires  
245 are connected at the two opposite sides of the hybrid TCEs using silver paste. For the  
246 fabrication of a portable thermotherapy device, the as-prepared transparent heater on PET  
247 substrate is mounted on a transparent and thermally conducting 3M tape and affixed to the  
248 wrist. The compact and portable power supply is assembled by connecting a 3.7 V lithium  
249 polymer battery (KP 301523 250 mAh), switch (NC KCD-002), and a variable potentiometer  
250 (Alps Alpine, 729-3420, RK09L1140A65) in a 5.5 x 3.5 cm<sup>2</sup> box. The variable potentiometer  
251 is used to control the power to generate the required heating temperature for healing.

### 252 **3.6 Characterization of Metal micro-mesh, Ti<sub>3</sub>C<sub>2</sub>T<sub>x</sub> MXene, hybrid transparent heater,** 253 **thermotherapy device:**

254 XRD diffraction pattern of samples is performed in PAN analytical (X'Pert PRO, 40  
255 kV, 30 mA, wavelength ~ 0.154 nm) and Bruker AXS D8 Advanced equipment (40 kV, 40  
256 mA, wavelength ~ 0.15406 nm) with Cu K $\alpha$  radiation. Optical microscope images are captured  
257 using Olympus microscopes (BX-51 and DSX 510). The alignment of the mesh structures is  
258 analyzed using FFT in Gwydion 64-bit software. Ti<sub>3</sub>C<sub>2</sub>T<sub>x</sub> MXene is characterized by depositing  
259 thin films on the glass/PET substrate. Raman spectroscopy of Ti<sub>3</sub>C<sub>2</sub>T<sub>x</sub> MXene is performed  
260 using Raman Triple spectrometer Jobin-Yvon T64000 by exciting the sample with Nd: YAG  
261 green laser (532.5 nm, ~ 1 mW power). The thickness of the samples is measured using Veeco,  
262 di CP-II and Asylum Research MFP-3D AFM in tapping mode. Zeta potential and particle size



263 distribution of  $Ti_3C_2T_x$  MXene are analyzed using the Dynamic Light Scattering method at a  
264 pH of 7 (ZEN3600). The transmission measurements of the samples are performed in UV-VIS-  
265 Agilent 8453 UV-visible Spectroscopy System with reference to the glass/PET substrate. The  
266 sheet resistance of metal micro-meshes,  $Ti_3C_2T_x$  MXene, and hybrid TCEs is estimated with  
267 Keithley 2634B SMU in two probe configurations. Comparison of the charging effect between  
268 pristine Ag micro-mesh and hybrid Ag micro-mesh/MXene is visualized with FESEM (JEOL  
269 JSM-7500F). A blue LED is used to demonstrate the electrical and mechanical performance of  
270 the hybrid TCE. The transparent heaters are powered with a DC voltage source (HTC  
271 instruments DC 3002-II), and temperatures are recorded using a k-type thermocouple  
272 (Thermometer: Version 1312-EN-00, FLIR ONE PRO, and FLIR E5 thermal imaging cameras.  
273 The thermal images/video of the transparent heaters and the thermotherapy devices are  
274 captured using FLIR ONE PRO, a thermal imaging camera.

275

## 276 **Notes and references**

- 277 1 Z. Ma, S. Kang, J. Ma, L. Shao, A. Wei, C. Liang, J. Gu, B. Yang, D. Dong, L. Wei, and  
278 Z. Ji, *ACS Nano*, 2019, **13**, 7578–7590.
- 279 2 L. Zhao, S. Yu, X. Li, M. Wu, and L. Li, *Org. Electron.*, 2020, **82**, 105511.
- 280 3 H. Tang, H. Feng, H. Wang, X. Wan, J. Liang, and Y. Chen, *ACS Appl. Mater.*  
281 *Interfaces*, 2019, **11**, 25330–25337.
- 282 4 T. Hu, J. Wang, H. Zhang, Z. Li, M. Hu and X. Wang, *Phys. Chem. Chem. Phys.*, 2015,  
283 **17**, 9997–10003.
- 284 5 Z. Wang, H. Kim, and H. N. Alshareef, *Adv. Mater.*, 2018, **30**, 1706656.
- 285
- 286 6 J. Park, D. Han, S. Choi, Y. Kim and J. Kwak, *RSC Adv.* 2019, **9**, 5731–5737.
- 287 7 E. Thouti, C. Mistry, A. Chandran, D. Kumar Panwar, P. Kumar, H. Suman and J.

- 288 Akhtar, *J. Phys. D. Appl. Phys.* 2019, **52**, 425301.
- 289 8 S. Kiruthika, R. Gupta and G. U. Kulkarni, *RSC Adv.* 2014, **4**, 49745–49751.
- 290 9 D. Lordan, M. Burke, M. Manning, A. Martin, A. Amann, D. O’Connell, R. Murphy, C.  
291 Lyons and A. J. Quinn, *ACS Appl. Mater. Interfaces*, 2017, **9**, 4932–4940.
- 292 10 R. Gupta, K. D. M. Rao, K. Srivastava, A. Kumar, S. Kiruthika and G. U. Kulkarni, *ACS*  
293 *Appl. Mater. Interfaces*, 2014, **6**, 13688–13696.
- 294 11 K. D. M. Rao, R. Gupta and G. U. Kulkarni, *Adv. Mater. Interfaces*, 2014, **1**, 1400090.
- 295 12 S. Ji, W. He, K. Wang, Y. Ran and C. Ye, *Small*, 2014, **10**, 4951–4960.
- 296 13 N. Tiwari, Ankit, M. Rajput, M. R. Kulkarni, R. A. John and N. Mathews, *Nanoscale*,  
297 2017, **9**, 14990–14997.
- 298 14 M. N. Gueye, A. Carella, R. Demadrille and J. P. Simonato, *ACS Appl. Mater.*  
299 *Interfaces*, 2017, **9**, 27250–27256.
- 300 15 J. Jang, B. G. Hyun, S. Ji, E. Cho, B. W. An, W. H. Cheong and J.-U. Park, *NPG Asia*  
301 *Mater.* 2017, **9**, e432.
- 302 16 K. D. M. Rao and G. U. Kulkarni, *Nanoscale*, 2014, **6**, 5645–5651.
- 303 17 P. Li, J. G. Ma, H. Y. Xu, D. Lin, X. D. Xue, X. Z. Yan, P. Xia and Y. C. Liu, *J. Alloys*  
304 *Compd.*, 2016, **664**, 764–769.
- 305 18 S. Walia, R. Gupta, K. D. M. Rao and G. U. Kulkarni, *ACS Appl. Mater. Interfaces*,  
306 2016, **8**, 23419–23424.
- 307 19 Y. Kim, H. R. Lee, T. Saito and Y. Nishi, *Appl. Phys. Lett.* 2017, **110**, 153301.

- 308 20 N. S. Jang, S. H. Jung, E. J. An, J. W. Oh, H. M. Lee and J. M. Kim, *J. Mater. Chem. C*,  
309 2019, **7**, 9698–9708.
- 310 21 B. W. An, E. J. Gwak, K. Kim, Y. C. Kim, J. Jang, J. Y. Kim and J. U. Park, *Nano Lett.*,  
311 2016, **16**, 471–478.
- 312 22 J. G. Lee, J. H. Lee, S. An, D. Y. Kim, T. G. Kim, S. S. Al-Deyab, A. L. Yarin and S. S.  
313 Yoon, *J. Mater. Chem. A*, 2017, **5**, 6677–6685.
- 314 23 N. S. Jang, K. H. Kim, S. H. Ha, S. H. Jung, H. M. Lee and J. M. Kim, *ACS Appl. Mater.*  
315 *Interfaces*, 2017, **9**, 19612–19621.
- 316 24 M. Zhang, C. Wang, X. Liang, Z. Yin, K. Xia, H. Wang, M. Jian and Y. Zhang, *Adv.*  
317 *Electron. Mater.*, 2017, **3**, 1700193.
- 318 25 Y. Wang, Z. Yu, G. Mao, Y. Liu, G. Liu, J. Shang, S. Qu, Q. Chen and R. W. Li, *Adv.*  
319 *Mater. Technol.*, 2019, **4**, 1800435.
- 320 26 X. Liu, X. Jin, L. Li, J. Wang, Y. Yang, Y. Cao and W. Wang, *J. Mater. Chem. A*, 2020,  
321 **8**, 12526–12537.
- 322 27 H. B. Lee, W. Y. Jin, M. M. Ovhall, N. Kumar, and J. W. Kang, *J. Mater. Chem. C*,  
323 2019, **7**, 1087–1110.
- 324 28 H. J. Kim, S. H. Lee, J. Lee, E. S. Lee, J. H. Choi, J. H. Jung, J. Y. Jung and D. G. Choi,  
325 *Small*, 2014, **10**, 3767–3774.
- 326
